# Supplementary material for: Intestinal microbial communities of rainbow trout (Oncorhynchus mykiss) may be improved by feeding a Hermetia illucens meal/low-fishmeal diet
Source: Springer Nature journal article supplement (doi:10.1007/s10695-020-00918-1), 2021-01-03

Fish Physiology and Biochemistry.

**Taxonomic and functional characterization of intestinal microbial communities of rainbow trout (*Oncorhynchus mykiss*) fed with *Hermetia illucens* meal as alternative protein source.** Simona Rimoldi, Micaela Antonini, Laura Gasco, Federico Moroni, and Genciana Terova. Department of Biotechnology and Life Sciences, University of Insubria, Via J.H. Dunant, 3, 21100 Varese, Italy. genciana.terova@uninsubria.it

**Supplementary Fig. 1** Rarefaction curves of chao1 alpha diversity index.

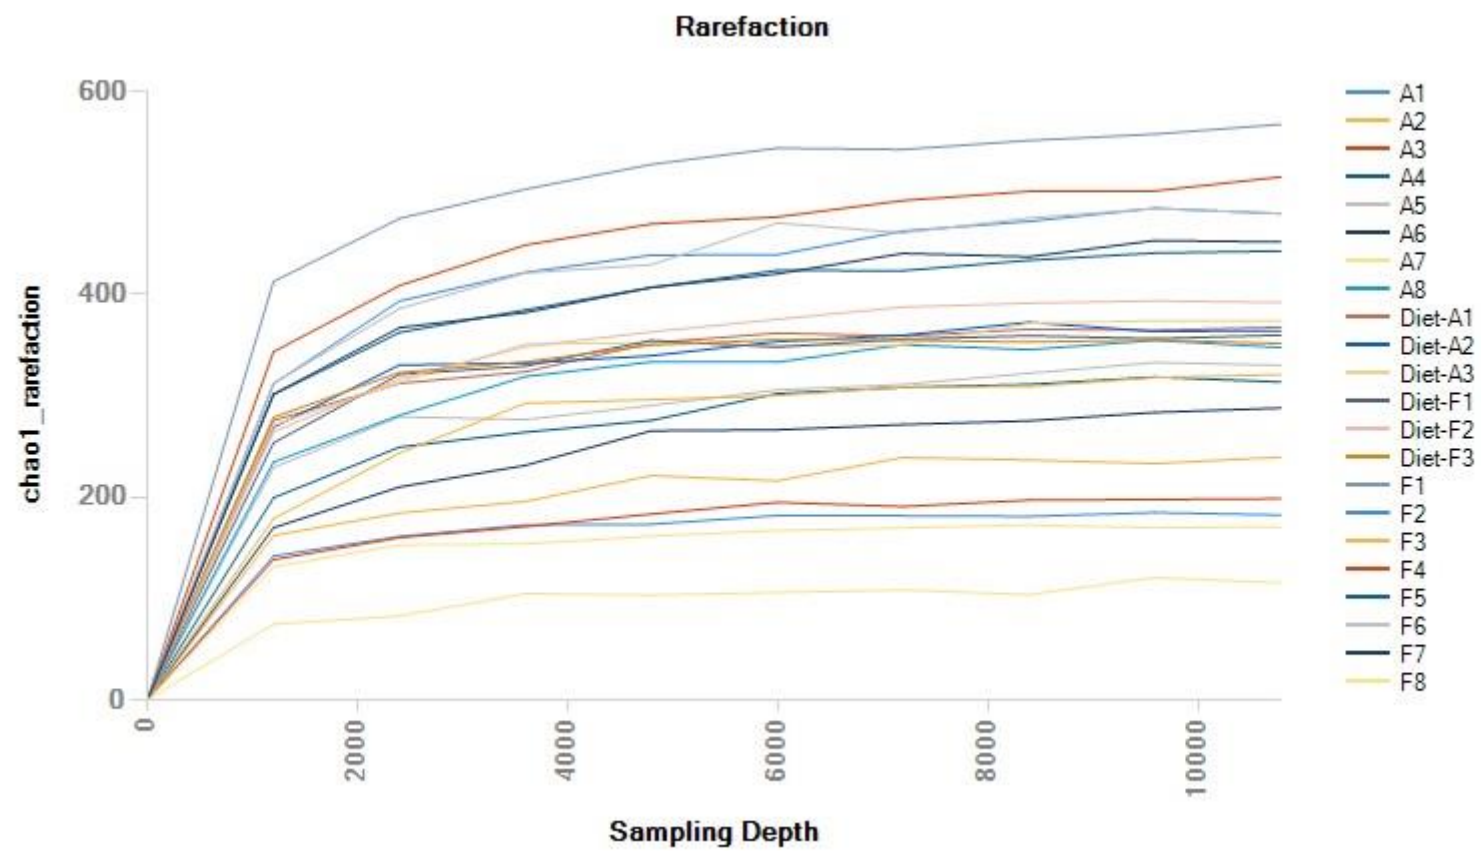

Supplement: MOESM1 [file 10695_2020_918_MOESM1_ESM.pdf]
